1 **Article Title**

2 Severity-stratified and longitudinal analysis of VWF/ADAMTS13 imbalance, altered fibrin crosslinking and inhibition  
3 of fibrinolysis as contributors to COVID-19 coagulopathy

4 **Short Title**

5 South: Thromboinflammatory basis of COVID-19 coagulopathy

6 **Authors and Affiliation**

7 Kieron South\*<sup>1,2</sup>, PhD, Lucy Roberts<sup>1,2</sup>, MRes, Lucy Morris<sup>1,2</sup>, PhD, Elizabeth R. Mann<sup>1,3,4</sup>, PhD, Madhvi Menon<sup>1,2</sup>, PhD,  
8 Sean Blandin Knight<sup>1,3</sup>, MD PhD, Joanne E. Konkel<sup>1,3</sup>, PhD, Andrew Ustianowski<sup>5</sup>, MD, Prof Nawar Diar Bakerly<sup>6</sup>, MD,  
9 Prof Paul Dark<sup>7,8</sup>, MD PhD, Prof Angela Simpson<sup>1,8</sup>, MD PhD, Timothy Felton<sup>1,8</sup>, MD PhD, Alexander Horsley<sup>1,8</sup>, MD  
10 PhD, CIRCO<sup>||</sup>, Prof Tracy Hussell<sup>1,3</sup>, PhD, John R. Grainger<sup>1,3†</sup>, PhD, Prof Craig J. Smith<sup>9,10†</sup>, MD, and Prof Stuart M.  
11 Allan<sup>1,2†</sup>, PhD

- 12 1. Lydia Becker Institute of Immunology and Inflammation, School of Biological Sciences, Faculty of Biology,  
13 Medicine and Health, University of Manchester, Manchester Academic Health Science Centre, Room 2.16,  
14 Core Technology Facility, 46 Grafton Street, Manchester, M13 9PL, UK.
- 15 2. Division of Neuroscience and Experimental Psychology, School of Biological Sciences, Faculty of Biology,  
16 Medicine and Health, The University of Manchester, Manchester Academic Health Science Centre, AV Hill  
17 Building, Manchester, M13 9PT
- 18 3. Division of Infection, Immunity and Respiratory Medicine, School of Biological Sciences, Faculty of Biology,  
19 Medicine and Health, The University of Manchester, Manchester Academic Health Science Centre, AV Hill  
20 Building, Manchester, M13 9PL
- 21 4. Maternal and Fetal Health Centre, Division of Developmental Biology, School of Medical Sciences, Faculty of  
22 Biology, Medicine and Health, The University of Manchester, 5th Floor St. Mary's Hospital, Oxford Road,  
23 Manchester M13 9WL, UK.
- 24 5. Regional Infectious Diseases Unit, North Manchester General Hospital, Manchester, UK.
- 25 6. Department of Respiratory Medicine, Salford Royal NHS Foundation Trust, Stott Lane, M6 8HD, UK.
- 26 7. Intensive Care Department, Salford Royal NHS Foundation Trust, Stott Lane, M6 8HD, UK.
- 27 8. Division of Infection, Immunity and Respiratory Medicine, Manchester NIHR BRC, Education and Research  
28 Centre, Wythenshawe Hospital, UK.
- 29 9. Division of Cardiovascular Sciences, Faculty of Biology, Medicine and Health, The University of Manchester,  
30 Manchester Academic Health Science Centre, Manchester, M13 9PT
- 31 10. Manchester Centre for Clinical Neurosciences, Manchester Academic Health Science Centre, Salford Royal  
32 NHS Foundation Trust, Salford M6 8HD

33 \*Corresponding author

34 † Joint Senior Authors

35 <sup>||</sup> CIRCO investigators listed in Authors section of manuscript

36 **Corresponding Author**

37 Kieron South, Division of Neuroscience and Experimental Psychology, Lydia Becker Institute of Immunology and  
38 Inflammation, School of Biological Sciences, Faculty of Biology, Medicine and Health, The University of Manchester,  
39 Manchester Academic Health Science Centre, AV Hill Building, Room 2.012, The University of Manchester,  
40 Manchester, M13 9PT Email: [kieron.south@manchester.ac.uk](mailto:kieron.south@manchester.ac.uk), Phone: 0161 275 5593

41 **Word Counts**

42 **Total:** 9130

**Main text:** 4735

**Abstract:** 304

43 **Figure Count:** 5 (+3 in Supplementary) **Table Count:** 1 **Reference Count:** 48

NOTE: This preprint reports new research that has not been certified by peer review and should not be used to guide clinical practice.

## 1 Abstract

2 **Background:** Early clinical reports have suggested that the prevalence of thrombotic complications in the  
3 pathogenesis of COVID-19 may be as high as 30% in intensive care unit (ICU)-admitted patients and could be a major  
4 factor contributing to mortality. However, mechanisms underlying COVID-19-associated thrombo-coagulopathy, and  
5 its impact on patient morbidity and mortality, are still poorly understood. **Methods:** We performed a comprehensive  
6 analysis of coagulation and thromboinflammatory factors in plasma from COVID-19 patients with varying degrees of  
7 disease severity. Furthermore, we assessed the functional impact of these factors on clot formation and clot lysis.  
8 **Results:** Across all COVID-19 disease severities (mild, moderate and severe) we observed a significant increase (6-  
9 fold) in the concentration of ultra-large von Willebrand factor (UL-VWF) multimers compared to healthy controls.  
10 This is likely the result of an interleukin (IL)-6 driven imbalance of VWF and the regulatory protease ADAMTS13 (a  
11 disintegrin and metalloproteinase with thrombospondin type 1 motifs, member 13). Upregulation of this key pro-  
12 coagulant pathway may also be influenced by the observed increase (~6-fold) in plasma  $\alpha$ -defensins, a consequence  
13 of increased numbers of neutrophils and neutrophil activation. Markers of endothelial, platelet and leukocyte  
14 activation were accompanied by increased plasma concentrations of Factor XIII (FXIII) and plasminogen activator  
15 inhibitor (PAI)-1. In patients with high FXIII we observed alteration of the fibrin network structure in *in vitro* assays of  
16 clot formation, which coupled with increased PAI-1, prolonged the time to clot lysis by the t-PA/plasmin fibrinolytic  
17 pathway by 52% across all COVID-19 patients (n=23). **Conclusions:** We show that an imbalance in the  
18 VWF/ADAMTS13 axis causing increased VWF reactivity may contribute to the formation of platelet-rich thrombi in  
19 the pulmonary vasculature of COVID-19 patients. Through immune and inflammatory responses, COVID-19 also  
20 alters the balance of factors involved in fibrin generation and fibrinolysis which accounts for the persistent fibrin  
21 deposition previously observed in post-mortem lung tissue.

## 22 What is new?

- 23 • In all COVID-19 patients, even mild cases, UL-VWF is present in plasma due to the alteration of VWF  
24 and ADAMTS13 concentrations, likely driven by increased IL-6 and  $\alpha$ -defensins.
- 25 • Increased plasma FXIII alters fibrin structure and enhances incorporation of VWF into fibrin clusters.
- 26 • Defective fibrin structure, coupled with increased plasma PAI-1 and  $\alpha$ 2-antiplasmin, inhibits  
27 fibrinolysis by t-PA/plasmin.

## 30 What are the clinical implications?

- 31 • Prophylactic anticoagulation and management of thrombotic complications in COVID-19 patients are  
32 ongoing challenges requiring a better understanding of the coagulopathic mechanisms involved.
- 33 • We have identified FXIII and VWF as potential therapeutic targets for treating fibrin formation  
34 defects in COVID-19 patients.
- 35 • We have identified a multifaceted fibrinolytic resistance in COVID-19 patient plasma with potential  
36 implications in the treatment of secondary thrombotic events such as acute ischaemic stroke or  
37 massive pulmonary embolism.

## 1 Introduction

2 The severe acute respiratory syndrome coronavirus (SARS-CoV)-2 pandemic, since its origin in December 2019, has  
3 affected more than 20 million individuals worldwide resulting in almost 750,000 fatalities. The diseased state  
4 induced by the virus, coronavirus disease 2019 (COVID-19), manifests as a broad clinical spectrum ranging from  
5 asymptomatic individuals, through to a mild flu-like illness and, in a small proportion of people, a severe hyper-  
6 inflammatory state causing acute respiratory distress syndrome (ARDS), multiple organ failure and death. Early  
7 clinical and post-mortem observations also indicated the existence of a hyper-coagulative state, seemingly distinct  
8 from sepsis-induced disseminated intravascular coagulation (DIC), which was widespread amongst critically-ill  
9 patients<sup>1, 2</sup>.

10 Subsequent studies have estimated an incidence of thrombotic events (mainly pulmonary embolism and venous  
11 thromboembolism) in the range of 15-30%, but as high as 69%, of intensive care unit (ICU)-admitted patients<sup>3-6</sup>.  
12 Moreover, thrombotic complications have been reported in an estimated 6% of patients across general wards, all of  
13 whom had received prophylactic anticoagulants<sup>6</sup>. Potential manifestations of this hyper-coagulative state are acute  
14 limb ischaemia<sup>7</sup>, deep vein thrombosis<sup>8</sup>, pulmonary embolism and ischaemic stroke<sup>8-11</sup>. Early estimates of ischaemic  
15 stroke prevalence amongst COVID-19 admissions range from 0.9% to 5% amongst severe cases<sup>11, 12</sup>. Interestingly,  
16 one small case series identified an apparent increased risk in young adults, many of whom presented with stroke and  
17 asymptomatic SARS-CoV-2 infection<sup>12</sup>. This may suggest that thrombotic complications are not restricted to those at  
18 risk of more severe disease progression. Definitive evidence, from large prospective studies, for a causal relationship  
19 between COVID-19 and stroke is still required<sup>13</sup>.

20 There has been much discussion postulating possible mechanisms underlying the COVID-19 associated coagulopathy  
21 and the idea that immunothrombosis, or thromboinflammation, is driving the pro-coagulant state is beginning to  
22 gain prominence. Recent studies have identified altered platelet reactivity (and increased platelet-leukocyte  
23 interactions)<sup>14</sup>, release of neutrophil extracellular traps (NETs)<sup>15</sup> and endothelial activation<sup>16</sup> in COVID-19 patients.  
24 Several studies have identified an increase in plasma VWF associated with COVID-19<sup>16-18</sup>, however, these have  
25 concentrated on those with severe disease (ICU versus non-ICU) and have not included concurrent longitudinal  
26 analyses of both VWF and other thromboinflammatory markers. As such, the mechanisms underlying the presence  
27 of VWF and how this relates to patient morbidity, mortality or recovery remains unclear.

28 The extremely high and persistent D-dimer levels observed in some COVID-19 patients are an indicator of poor  
29 prognosis. They indicate ongoing fibrin formation and fibrinolysis but may also suggest that, while still functional, the  
30 fibrinolytic system is overwhelmed<sup>19</sup>. Whether this is due to enhanced fibrinolytic resistance or direct inhibition of  
31 pro-fibrinolytic factors is unknown. The former may result from a local increase in Factor XIII which, through its fibrin  
32 crosslinking activity, stabilises fibrin clots. This is due to both a direct influence of fibrin structure<sup>20</sup> and the  
33 incorporation of  $\alpha$ 2-antiplasmin into the fibrin network<sup>21</sup>. Direct inhibition of fibrinolysis is mediated by the soluble  
34 factors plasminogen activator inhibitor-1 (PAI-1) and thrombin-activatable fibrinolysis inhibitor (TAFI), both of which  
35 interfere with the normal fibrinolytic activity of tissue plasminogen activator (t-PA). A combination of these  
36 processes might be expected to produce persistent fibrin deposits that are resistant to fibrinolysis, as is suggested by  
37 COVID-19 lung pathology.

38 The aim of this study is to identify potential haemostatic deficits, and underlying thromboinflammatory mechanisms,  
39 in COVID-19 patient plasma using a combination of clinical measurements and functional coagulation assays. The  
40 relationship between these parameters and their significance in disease progression and outcome have been  
41 addressed by the application of disease severity stratification and longitudinal sampling.

42

43

44

45

## 1 **Methods**

### 2 **Study Design**

3 Between 29<sup>th</sup> March and 7<sup>th</sup> May 2020, patients admitted with suspected COVID-19 were recruited across hospitals  
4 in the Greater Manchester area. Peripheral blood samples were collected at Manchester University Foundation Trust  
5 (MFT), Salford Royal NHS Foundation Trust (SRFT) and Pennine Acute NHS Trust (PAT) under the framework of the  
6 Manchester Allergy, Respiratory and Thoracic Surgery (ManARTS) Biobank (study no M2020-88) for MFT or the  
7 Northern Care Alliance Research Collection (NCARC) tissue biobank (study no NCA-009) for SRFT and PAT (REC  
8 reference 15/NW/0409 for ManARTS and 18/WA/0368 for NCARC). Informed consent was obtained for each patient  
9 and clinical information was extracted from written/electronic medical records. Patients were eligible for the study if  
10 they tested positive for SARS-CoV-2 by reverse-transcriptase-polymerase-chain-reaction (RT-PCR) of nasopharyngeal  
11 swabs, or, in the absence of a positive RT-PCR test, by high clinical suspicion of COVID-19 with characteristic  
12 radiological findings. Patients were excluded on the basis of a negative RT-PCR combined with indeterminate  
13 radiological findings, if an alternate diagnosis was reached or if the patient had a confounding acute illness.

14 Severity stratification of recruited patients was based on the degree of respiratory failure. Mild cases were  
15 characterised by a supplemental oxygen requirement of <3l or <28% and management in a ward-based  
16 environment. Moderate cases required <10l or <60% supplemental oxygen and management in a ward-based  
17 environment. Those determined to have severe disease required >10l or >60% supplemental oxygen, were managed  
18 in ICU and/or required invasive ventilation. When severity levels changed during admission, patients were stratified  
19 by their highest disease severity score. All cross-sectional comparisons between the groups were performed using  
20 the first available sample, collected as soon as possible after admission. Longitudinal samples for a sub-set of severe  
21 patients were collected at 1-2 day intervals.

### 22 **Healthy controls**

23 Four healthy control plasma samples were obtained from Manchester University and NHS Trust front line staff at the  
24 time of collecting patient plasma. These individuals were asymptomatic and assumed COVID-19 negative but were  
25 not tested. A further 16 healthy controls samples, pre-dating the COVID-19 pandemic, were obtained as part of a  
26 previous study and were included in these analyses to ensure age/sex matching of controls to COVID-19 patient  
27 samples. Of these, 4 were receiving aspirin but none were otherwise anti-coagulated.

### 28 **Plasma preparation**

29 Whole blood, collected using BD Vacutainers containing 3.2% trisodium citrate, was diluted 2-fold in phosphate  
30 buffered saline (PBS) and fractionated by density gradient centrifugation. Platelet rich plasma was removed and  
31 centrifuged further to deplete platelets. Platelet poor plasma was stored at -80°C for analysis. Total plasma protein  
32 concentration was quantified by BCA assay (Pierce) following manufacturer's protocol.

### 33 **Multiplex assays**

34 An initial screen of coagulation factors was performed on a small cohort of healthy control (n=4) and COVID-19  
35 patient plasma (n=12) using Procartaplex (Thermo-Fisher) mix and match coagulation panels (Factors X, XI, XII, V, VII,  
36 VIII, Protein C and Protein S). All were performed following manufacturer's instructions and analysed on a Bio-Plex  
37 200 Luminex analyser (Bio-Rad).

38 All subsequent analyses were performed on the full cohort of healthy control (n=20) and COVID-19 patient plasma  
39 (n=23) using the following LEGENDplex panels. Human inflammation 13-plex panel (IL-1 $\beta$ , IFN- $\alpha$ 2, IFN- $\gamma$ , TNF- $\alpha$ , MCP-  
40 1, IL-6, IL-8, IL-10, IL-12p70, IL-17A, IL-18, IL-23 and IL-33) human thrombosis custom 7-plex panel (P-selectin, D-  
41 dimer, PSGL-1, t-PA, sCD40L, tissue factor and Factor IX) and human fibrinolysis 5-plex panel (fibrinogen,  
42 plasminogen, antithrombin, prothrombin and Factor XIII). All were performed using the manufacturer's protocol and  
43 suggested dilutions. Analysis was performed using a BD FACSVerser flow cytometer (BD Biosciences) and LEGENDplex  
44 data analysis software version 8.0.

## 1 **Quantification of Thromboinflammatory Markers in Plasma by ELISA**

2 Plasma VWF and ADAMTS13 antigen levels were determined by in-house ELISA as described previously<sup>22</sup>, with intra-  
3 and inter- assay coefficients of variation of 5 and 8% respectively for VWF and 8 and 12% respectively for  
4 ADAMTS13<sup>23</sup>.

5 The presence of UL-VWF in plasma was determined by an ELISA-based collagen binding assay<sup>23</sup>. Results are  
6 presented as both VWF:CBA (%), in which the signal is normalised to that of healthy controls, and the ratio of  
7 VWF:CBA/Ag, in which the extent of collagen binding is normalised by the total VWF antigen determined by ELISA.

8 Commercial ELISA kits were used, following manufacturer's protocols, to quantify  $\alpha$ -defensins (human HNP (1-3)  
9 ELISA, Hycult Biotech),  $\alpha$ 2-antiplasmin (human Serpin F2 ELISA, Invitrogen), TAFI (human carboxypeptidase B2/CPB2  
10 ELISA, Invitrogen) and PAI-1 (Invitrogen).

## 11 **Turbidity assay of fibrin formation**

12 Sample plasma was warmed to 37°C and diluted 2-fold in Hank's Balanced Salt Solution (HBSS) supplemented with  
13 20 mM CaCl<sub>2</sub> in clear, flat-bottomed 96-well plates in a final volume of 50  $\mu$ l. The assay was initiated by the addition  
14 of 5 nM (0.5 U/ml) human thrombin (Sigma-Aldrich) at which point the samples were mixed for 10 seconds at 700  
15 rpm in the heated chamber of a FluoSTAR Omega microplate reader (BMG Labtech) pre-heated to 37°C. The  
16 absorbance at 405 nm was measured at 20 second intervals for a total of 30 minutes.

## 17 **Confocal microscopy of fibrin structure**

18 Plasma from 3 healthy controls and 3 patients in each COVID-19 subgroup was diluted as above, in a total volume of  
19 200  $\mu$ l in 12-well chamber slides. These preparations were supplemented with 150  $\mu$ g/ml AlexaFluor594 labelled  
20 fibrinogen (Invitrogen) and 10  $\mu$ g/ml AlexaFluor647 conjugated  $\alpha$ -VWF antibody (Abcam) and pre-warmed to 37°C.  
21 Fibrin polymerisation was initiated by the addition of 5 nM (0.5 U/ml) human thrombin and left to occur at 37°C for 1  
22 hour. Images were acquired on a Leica SP8 inverted confocal microscope equipped with a heated chamber  
23 maintained at 37°C. A 10x/0.40 APO dry objective and zoom factor of 0.75 were used to acquire images of 1550  $\mu$ m x  
24 1550  $\mu$ m. HyD hybrid detectors were used to detect fibrinogen-594 and VWF-647 with emission gates of 600-642 nm  
25 and 691-787 nm, respectively. Images were analysed in ImageJ.

## 26 **Fibrinolysis assay**

27 Plasma, diluted as above, was pre-warmed to 37°C. The assay was initiated by the addition of 10 nM (1 U/ml) human  
28 thrombin and 25 ng/ml rt-PA (Alteplase, Hoffmann La Roche) at which point the samples were placed in the heated  
29 chamber of a FluoSTAR Omega plate reader. Absorbance at 405 nm was measured every 30 s for 1 h with continuous  
30 double orbital shaking between measurements.

## 32 **Results**

### 33 **CIRCO patient characteristics**

34 A total of 23 eligible patients, with sufficient observations to allow stratification of disease severity, were recruited  
35 with a median time from patient-reported symptom onset to hospital admission of 8 days. The median age was 58  
36 years and 69.6% were male compared with a median age of 67 years and 43.8% male in the healthy control group.  
37 The majority of patients (69.6%) tested positive for SARS-CoV-2 by RT-PCR and the remaining 30.4%, with negative  
38 RT-PCR, had moderate or severe radiological findings. Frequent co-morbidities amongst patients were diabetes,  
39 hypertension (HTN), ischaemic heart disease (IHD), chronic obstructive pulmonary disease (COPD) and asthma (**Table**  
40 **1**). A total of 82.4% of patients received thromboprophylaxis and 10% received a treatment dose of anti-coagulants.  
41 The only complications observed were acute kidney injury (AKI) in 2 moderate patients and pulmonary embolism  
42 (PE) in 1 moderate patient (**Table 1**). Death occurred in 1 mild patient (aged 84) and 2 severe patients (aged 74 and  
43 81).

## 1 **Peripheral inflammatory markers are increased in COVID-19**

2 The plasma concentrations of the primary anti-viral cytokines IFN- $\alpha$  and TNF- $\alpha$  were not significantly different  
3 between COVID-19 patients and healthy controls (**Figure 1**). The peripheral pro-inflammatory response to COVID-19  
4 showed significant increases, compared to healthy controls, for all cytokines except IL-1 $\beta$  and IL-12p70 (**Figure 1 and**  
5 **Table 1**). IL-6, IL-8, IL-10, IL-18, IL-23 and IL-33 were universally increased in all COVID-19 sub-groups compared to  
6 healthy controls (**Figure 1**) with IL-6 and IL-8 displaying the largest increase (>40-fold and >4-fold, respectively).  
7 Other markers of thromboinflammation (P-selectin, PSGL-1 and sCD40L) were all increased ~2-fold when comparing  
8 all COVID-19 samples against healthy controls (**Table 1**), but only P-selectin was statistically significant ( $p < 0.01$ ).

9 Longitudinal sampling was performed on 4 of the severe COVID-19 patients and has suggested some relationships  
10 between inflammatory and thrombotic parameters (**Figure S3**). The concentrations of IL-6, IL-8 and MCP-1 all  
11 decreased over time in patient 21, peaked at day 3 in patient 20 and increased between day 6 and day 10 in patient  
12 22. In patients 21 and 22 an inverse IL-18 response was observed. A relationship was observed between the  
13 inflammatory response (particularly IL-6) and the  $\alpha$ -defensin, VWF and PAI-1 responses.

## 14 **VWF/ADAMTS13 imbalance is present across all COVID-19 severity groups**

15 An initial Luminex screen of coagulation factor levels in 4 healthy control samples and 12 COVID-19 patient samples  
16 identified no significant difference in the PE fluorescence of beads specific to Factors V, VII, VIII, X, XI and XII, Protein  
17 S or Protein C (**Figure S1**). Factor IX, antithrombin and prothrombin concentrations were within the normal range  
18 with no significant differences between the groups (**Table 1**). Compared to healthy controls, there was a significant  
19 increase in D-Dimer concentration (determined by Legendplex) in plasma from the severe COVID-19 group  
20 ( $p = 0.004$ ), however, all values were still within the normal range (**Table 1**). The limited number of available results  
21 from clinical D-dimer tests identified high concentrations (>500 ng/ml) in some patients (**Table 1**).

22 A COVID-19 associated increase in the levels of plasma VWF was identified in this initial multiplex screen and was  
23 subsequently quantified by ELISA. Healthy controls were all within the normal range (60-190% of 10  $\mu\text{g/ml}$ ) with a  
24 mean value of  $7.5 \pm 1.2 \mu\text{g/ml}$ . This was significantly increased to  $25.9 \pm 10.8$ ,  $19.4 \pm 6.6$  and  $26.1 \pm 7.3 \mu\text{g/ml}$  in the  
25 mild, moderate and severe COVID-19 groups respectively (**Figure 2A**). The concentration of ADAMTS13 was also  
26 within the normal range (74-142% of 900 ng/ml) for all healthy controls with a mean value of  $998 \pm 112 \text{ ng/ml}$ , but  
27 was reduced to  $538 \pm 163$ ,  $582 \pm 181$  and  $589 \pm 124 \text{ ng/ml}$  in the mild, moderate and severe groups (**Figure 2B**). We  
28 also observed a small, but significant, increase (4-6 fold) in neutrophil  $\alpha$ -defensins across all COVID-19 sub-groups  
29 compared to healthy controls (**Figure 2C**).

30 A significant inverse relationship between VWF and ADAMTS13 concentration was observed as was a clear  
31 segregation of the healthy and patient groups (**Figure 2D**). There was also a significant correlation between VWF and  
32 IL-6 concentration (**Figure 2E**) and an inverse relationship between ADAMTS13 and IL-6 (**Figure 2F**). A collagen  
33 binding assay was used as a measure of VWF multimeric size and activity with the amount of collagen-bound VWF  
34 (VWF:CBA) in each sample normalised to the mean of the healthy control samples ( $100 \pm 15.7 \%$ ). In the mild,  
35 moderate and severe COVID-19 groups there was significantly higher VWF activity with mean values of  $596 \pm 422$ ,  
36  $359 \pm 120$  and  $691 \pm 445 \%$ , respectively (**Figure 2G**). The significance of these measurements remained when the  
37 activities were normalised by VWF antigen (Ag) levels (**Figure 2H**) and a significant inverse relationship was observed  
38 between the ratio of VWF:CBA/Ag and ADAMTS13 concentration (**Figure 2J**).

## 39 **Defective fibrin formation occurs in COVID-19 patient plasma**

40 Fibrin formation was monitored *in vitro* using a turbidity-based assay (**Figures 3A and 3B**). An increase in initial rate  
41 was observed in all COVID-19 sub-groups with a ~2-fold change in slope being seen in the moderate and severe  
42 groups (**Figure 3D**). Confocal imaging of fibrin clots, formed *in vitro*, was carried out to confirm that the increased  
43 initial rate of fibrin formation in patient plasma was the result of structural changes in the fibrin network (**Figure 3C**).  
44 In healthy control plasma ( $n = 3$ ) the fibrin network appeared to be evenly distributed, consisting of fine fibrin fibres  
45 with only small and few fibrin clusters (**Figure S2A**). In healthy control 'clots' there was very little VWF staining and it  
46 appeared to be largely localised within the small fibrin clusters (**Figure S2B**). A similarly even fibrin distribution was

1 observed in all mild (n=3) and moderate (n=3) patient 'clots', albeit with larger and more abundant fibrin clusters.  
2 Plasma from patient 4 formed fibrin with some much larger fibrin clusters approaching 150  $\mu\text{m}$  in length (**Figure**  
3 **S2A**). The most apparent change in fibrin structure was observed in the severe patients 18 and, in particular, patient  
4 20 (**Figure S2A**). Again, VWF was co-localised with the large fibrin clusters and, in line with their increased size, was  
5 much more abundant (**Figure S2B**).

6 The concentration of tissue factor (TF) was within normal range (5.9-200.9 pg/ml) in all healthy controls and all  
7 COVID-19 patient samples, except 2 of the moderate cases (**Figure 3E**), with no significant difference in mean values  
8 between the groups. The concentration of fibrinogen in healthy controls was generally within either the  
9 manufacturer's (0.75-1.7 mg/ml) or the clinical (2-4.5 mg/ml) normal range<sup>24</sup> (**Figure 3E**). Of the 20 healthy controls  
10 only 4 were above the upper limit of normal, however, the mean value of 2.51 mg/ml was within range. There was a  
11 statistically significant increase in fibrinogen in the moderate and severe COVID-19 sub-groups, values all being  
12 above the upper limit of the normal range. A similar pattern of factor XIII (FXIII) concentrations was observed, with  
13 14 out of the 20 healthy controls falling below the upper limit of the manufacturer's normal range (6.7-15.3  $\mu\text{g}/\text{ml}$ )  
14 and a mean value that was within this range (10.9  $\mu\text{g}/\text{ml}$ ). There was a significant increase in FXIII concentrations in  
15 all COVID-19 sub-groups (**Figure 3E**). Analysis of longitudinal samples from patient 21 identified a relationship  
16 between FXIII levels and impaired fibrin formation.

### 17 **Fibrin clot lysis by t-PA/plasmin is inhibited in COVID-19 patient plasma**

18 The time to clot lysis in healthy control samples (**Figure 4A, 4C**) was consistently in the range of 15-20 minutes but  
19 was suppressed in COVID-19 patient plasma (**Figure 4B**), as demonstrated by the increase in mean lysis time across  
20 all severity groups (**Figure 4C**). There appeared to be little effect of infection on the release of t-PA as the  
21 concentration in all healthy controls and most moderate and severe COVID-19 patient plasma was within, or  
22 marginally above, the normal range of 1.6-8.4 ng/ml (**Figure 4D**). Plasminogen levels were unaffected by COVID-19  
23 infection and were all within the normal range of 79-170  $\mu\text{g}/\text{ml}$  (**Table 1**). We observed a significant upregulation of  
24 PAI-1 in all COVID-19 sub-groups compared to healthy controls, of which, all but one were within the literature  
25 normal range of 20-100 ng/ml<sup>25</sup>, with COVID-19 samples all above this (**Figure 4D**). Analysis of longitudinal samples  
26 from patient 21 identified a relationship between PAI-1 concentration and impaired fibrinolysis. The concentrations  
27 of  $\alpha 2$ -antiplasmin were also influenced, with statistically significant increases observed in the mild and moderate  
28 COVID-19 sub-groups (**Figure 4E**). In healthy controls the plasma concentrations of  $\alpha 2$ -antiplasmin and TAFI were  
29 largely within the literature normal ranges of 50.4-85.4  $\mu\text{g}/\text{ml}$ <sup>16</sup> and 4-15  $\mu\text{g}/\text{ml}$ <sup>16</sup>, respectively. The mean  $\alpha 2$ -  
30 antiplasmin concentrations in the mild, moderate and severe COVID-19 groups were all above the normal range, as  
31 was the mean TAFI concentration in the severe group (**Figure 4E**).

## 32 **Discussion**

### 33 **A similar cytokine signature is present across all COVID-19 severity groups**

34 The peripheral cytokine signature observed in this study is similar to that reported previously in a parallel study of  
35 the same patients<sup>27</sup>, with low levels of anti-viral cytokines (IFN- $\alpha$  and TNF- $\alpha$ ) but substantial increases in pro-  
36 inflammatory cytokines (IL-6, IL-8, IL-10, IL-18, IL-23 and IL-33). This is true of all sub-groups, in particular the  
37 moderate and severe groups, in which the cytokine response is characteristic of ARDS of all causes<sup>28</sup> and is reflected  
38 in a progressive increase in total white blood cell and neutrophil counts across the severity groups. Longitudinal  
39 analysis of the cytokine signature in severe patients is in agreement with a previous report suggesting the cytokine  
40 response diminishes in some patients as the disease progresses in severity and over time which may indicate  
41 exhaustion of some immune cell populations producing these cytokines<sup>27</sup>.

### 42 **COVID-19-associated coagulopathy is distinct from DIC**

43 A screen of factors of the extrinsic, intrinsic and common coagulation cascades and key anti-coagulant pathways was  
44 performed in a smaller, initial cohort of samples and ruled out a role of these pathways in COVID-19 associated  
45 coagulopathy. Unlike in DIC, which was initially suspected as the cause of thrombotic complications in COVID-19  
46

1 patients due to high D-dimer and PT<sup>1</sup>, there does not appear to be a consumption of coagulation factors, including  
2 Factor IX, which was quantified in the full cohort of samples. This is in agreement with the lack of bleeding  
3 phenotype observed in patients with COVID-19-associated coagulopathy<sup>2</sup>. While D-dimer was elevated significantly  
4 in the severe COVID-19 group, all values were within the expected normal range for the assay and the available  
5 clinical D-dimer measurements, although above the clinical normal range of <500 ng/ml, were far from the 5-20  
6 µg/ml range that would suggest a diagnosis of DIC.

### 7 **VWF/ADAMTS13 imbalance is associated with increased IL-6 and neutrophil α-defensins**

8 Increased plasma VWF has been suggested, in multiple recent studies<sup>16-18</sup>, to be a key driving force behind COVID-19  
9 associated coagulopathy. This is further supported by the existence of VWF-platelet rich thrombi in the lungs of  
10 COVID-19 patients post-mortem which have been identified in numerous independent studies<sup>29-31</sup>. Our data is in  
11 agreement with this hypothesis as we report a substantial increase in plasma VWF, even in those with mild COVID-19  
12 disease. It is likely that this increase in VWF is the result of endothelial activation and Weibel-Palade body exocytosis,  
13 which have been shown *in vitro* to be induced by IL-6<sup>32</sup>. As such, we observed a strong correlation between plasma  
14 VWF and IL-6.

15 We also report a substantial decrease in ADAMTS13 antigen in COVID-19 patients which, to date, has only been  
16 reported in one small case series<sup>17</sup>. As with VWF, this response is present in all COVID-19 sub-groups and correlates  
17 with IL-6. Although VWF and ADAMTS13 have both been implicated in other thrombotic pathologies, they are most  
18 often seen as independent risk factors<sup>22, 23</sup>. The fact that there is a strong correlation between VWF and ADAMTS13  
19 in this cohort is unusual and may suggest that their increase and decrease, respectively, are driven by the same  
20 mediator, most likely IL-6. This is also indicated by longitudinal analysis, in particular that of patient 21, in which  
21 normal VWF/ADAMTS13 balance is restored as the IL-6 response diminishes. Other factors implicated in ADAMTS13  
22 suppression are age (as with VWF), cytokine inhibition of hepatic synthesis<sup>33</sup>, direct inhibition by IL-6<sup>32</sup> and direct  
23 inhibition by neutrophil α-defensins<sup>34</sup>. Interestingly, we report an increase in the plasma concentration of α-  
24 defensins in COVID-19 patients in our cohort and a robust inverse relationship between this and ADAMTS13 levels  
25 ( $R^2=0.50$ ,  $p<0.0001$ ). Neutrophil counts and neutrophil activation (soluble PSGL-1) are both increased in these  
26 samples, in line with another recent study<sup>35</sup>, and both correlate with plasma VWF ( $R^2=0.29$ ,  $p<0.01$  and  $R^2=0.10$ ,  
27  $p<0.05$ , respectively).

28 The expected functional consequence of a concurrent increase in VWF and decrease in ADAMTS13 would be an  
29 increase in the multimeric size and therefore, activity, of VWF. Indeed, we report a significant increase in VWF  
30 collagen binding activity in all COVID-19 sub-groups with some moderate and severe patients exhibiting a >10-fold  
31 increase. This would be expected to have an impact on platelet-recruitment and might also enhance platelet  
32 aggregation and platelet-leukocyte aggregation which have been observed in recent studies<sup>14, 36</sup>. Platelet counts in  
33 healthy controls were similar to that of patients therefore no relationship between increased VWF and platelet  
34 depletion could be identified in this cohort of COVID-19 patients. Mild thrombocytopenia has been reported  
35 previously in COVID-19 patients<sup>37</sup> but is only evident in three patients in this cohort and there is no apparent  
36 relationship between platelet count and VWF. Interestingly, in patient 21, in which VWF levels normalise in later  
37 samples, there is a corresponding increase in platelet count into the normal range.

### 38 **Platelet-derived FXIII alters *in vitro* fibrin formation and clot structure**

39 Perhaps the most universally altered parameter amongst COVID patient plasma is an increase in initial rate of *in vitro*  
40 fibrin formation. This does not appear to be the result of increased fibrinogen levels, observed here and in previous  
41 reports<sup>38, 39</sup>, as there is little variation in initial rate within the healthy control group despite differing fibrinogen  
42 concentrations. There is also a relatively weak correlation between fibrinogen concentration and initial rate  
43 ( $R^2=0.19$ ,  $p=0.003$ ). Instead, the alteration is likely the result of increased incorporation of VWF into the fibrin  
44 network<sup>40, 41</sup> and FXIII-mediated fibrin fibre compaction<sup>42</sup>. This is supported by a significant correlation between  
45 initial rate and both VWF ( $R^2=0.45$ ,  $p<0.0001$ ) and FXIII ( $R^2=0.30$ ,  $p=0.0002$ ) and by a longitudinal relationship  
46 between FXIII (increasing to above the normal range) and increased initial rate in patient 21. Furthermore, defective  
47 fibrin structure, identified by confocal imaging, is more apparent in patients who have FXIII levels above the normal  
48 range and particularly high VWF levels.



1 In those patients, large fibrin clusters were formed which contained VWF, mirroring the composition of thrombi  
2 identified in post-mortem lung examinations in COVID-19 patients<sup>30</sup>. These structures may derive from the fact that  
3 FXIII-mediated crosslinking of fibrin results in a higher density of fibres<sup>20</sup> and that FXIII is known to covalently  
4 crosslink VWF to fibrin<sup>43</sup>. Although the precise nature of this fibrin structure defect, and its potential impact on clot  
5 permeability, are not yet fully understood it is possible that the large fibrin clusters formed may be impermeable  
6 which might be expected to influence fibrinolysis (see below). Likely sources of the increased levels of FXIII in COVID-  
7 19 patients are monocytes, macrophages and platelets recruited to the pulmonary endothelium. Given the relatively  
8 normal number of circulating monocytes in all COVID-19 sub-groups, platelets appear to be the likely source of FXIII.  
9 Increased numbers of activated platelets have been identified as a common feature amongst COVID-19 patients<sup>14, 36</sup>  
10 and is indicated in this cohort by increased plasma P-selectin and soluble CD40L.

### 11 **Altered clot structure and endothelium-derived PAI-1 induce fibrinolytic resistance**

12 Based on the defective fibrin formation observed in COVID-19 patient plasma herein, and the previous identification  
13 of persistent fibrin deposits and hyaline membranes in post-mortem lung samples<sup>30</sup>, we hypothesised that fibrin  
14 formed in the pulmonary vasculature and alveolar spaces may be resistant to endogenous fibrinolysis. Using an *in*  
15 *vitro* assay of t-PA/plasmin-mediated fibrinolysis we have identified a ~2 fold extension of clot lysis times,  
16 irrespective of disease severity. This may be influenced, in part, by the altered fibrin structure described above and  
17 this is supported by a correlation between the initial rate of fibrin formation and time to clot lysis ( $R^2=0.75$ ,  
18  $p<0.0001$ ).

19 There are four main inhibitory factors that suppress fibrinolysis by the t-PA/plasmin pathway, PAI-1,  $\alpha 2$ -antiplasmin,  
20  $\alpha 2$ -macroglobulin and TAFI. Although they are all primarily produced by the liver, their plasma concentrations can be  
21 potentially influenced by inflammatory and immune responses known to be involved in COVID-19. The factor most  
22 significantly affected by COVID-19 seems to be PAI-1, with almost all patients exhibiting increased levels despite  
23 relatively normal levels of t-PA. The importance of this imbalance is reflected in the correlation between PAI-1 and  
24 an increased time to clot lysis ( $R^2=0.22$ ,  $p<0.002$ ). This is unsurprising as PAI-1 is known to be released from the  
25 activated endothelium, reported in a previous COVID-19 cohort<sup>16</sup> and evident in this cohort by increased plasma  
26 VWF, FVIII and P-selectin. Given the size of the vascular bed in the lungs this is likely to account for the majority of  
27 the PAI-1 increase, although there may also be a contribution from monocytes and macrophages in the pulmonary  
28 vasculature. Increased PAI-1 has been linked to obesity and identified in non-diabetic obese patients ( $BMI >30$ )<sup>44</sup>,  
29 however, most participants in this study had a  $BMI <30$  and this is unlikely to account for the large observed  
30 increase.

31 The impact of COVID-19 on the levels of  $\alpha 2$ -antiplasmin and TAFI, released locally at low levels by activated platelets,  
32 is arguably less significant. In the case of  $\alpha 2$ -antiplasmin there is a reasonably strong correlation between  $\alpha 2$ -  
33 antiplasmin and time to clot lysis ( $R^2=0.27$ ,  $p=0.0003$ ) indicating a disproportionate inhibitory effect. This is likely to  
34 be due to an enhancement of  $\alpha 2$ -antiplasmin's inhibitory potential caused by the concurrent increase in FXIII, thus  
35 increasing its incorporation into the fibrin network as it forms.

### 36 **Summary**

37 It should be noted that the haemostatic alterations identified in this cohort, and thrombotic complications of  
38 COVID19 reported previously<sup>5</sup>, have occurred despite most patients receiving thromboprophylaxis and, in some  
39 cases, treatment doses of anti-coagulants. Therefore, this may have implications in the ongoing management of such  
40 complications in patients who may require higher prophylactic doses while hospitalised and extended  
41 anticoagulation post-discharge. Until we have a complete understanding of the mechanism involved it may be  
42 difficult to predict which common anti-coagulant therapy, if any, is most appropriate. Given the apparent role of FXIII  
43 and VWF in the defective coagulation, experimental therapies targeting these factors such as the FXIII inhibitor  
44 tridegin<sup>45</sup> and rADAMTS13<sup>46, 47</sup>, are potentially worth pursuing. The apparent fibrinolytic resistance in COVID-19  
45 patients may also impact on the efficacy of rt-PA thrombolysis to treat hyperacute ischaemic stroke or massive  
46 pulmonary embolism complicating SARS-CoV-2 infection and, again, experimental avenues might need to be  
47 explored to overcome this. Potential new thrombolytic therapies such as rADAMTS13, which is unlikely to be

1 influenced by fibrinolytic inhibition, or  $\alpha$ 2-antiplasmin inhibitors, with the ability to correct the defective fibrinolysis  
2 thereby restoring the efficacy of rt-PA thrombolysis<sup>48</sup>, are both viable options that should be explored.

### 3 **Acknowledgements**

4 This work was funded by Medical Research Foundation Fellowship (MRF-076-0004-RG-SOUT-C0756) awarded to K.  
5 South. This report is independent research supported by the North West Lung Centre Charity and the National  
6 Institute for Health Research Manchester Clinical Research Facility at Manchester University NHS Foundation Trust  
7 (Wythenshawe). We acknowledge the Manchester Allergy, Respiratory and Thoracic Surgery Biobank for supporting  
8 this project and thank the study participants for their contribution. Angela Simpson, Alexander Horsely and Tim  
9 Felton are supported by the Manchester Biomedical Research Centre. Imaging was performed in the University of  
10 Manchester Bioimaging core facility. Flow cytometry and LEGENDplex assays were performed in the University of  
11 Manchester Flow Cytometry core facility.

### 12 **Authors**

13 CIRCO investigators:

14 Rohan Ahmed, Halima Ali Shuwa, Miriam Avery, Katharine Birchall, Oliver Brand, Evelyn Charsley, Alistair Chenery,  
15 Christine Chew, Richard Clark, Emma Connolly, Karen Connolly, Paul Dark, Simon Dawson, Laura Durrans, Hannah  
16 Durrington, Jasmine Egan, Claire Fox, Helen Francis, Miriam Franklin, Susannah Glasgow, Nicola Godfrey, Kathryn J.  
17 Gray, Seamus Grundy, Jacinta Guerin, Pamela Hackney, Mudassar Iqbal, Chantelle Hayes, Emma Hardy, Jade Harris,  
18 Anu John, Bethany Jolly, Verena Kästele, Saba Khan, Gabriella Lindergard, Graham Lord, Sylvia Lui, Lesley Lowe, Alex  
19 G Mathioudakis, Flora A. McClure, Joanne Mitchell, Clare Moizer, Katrina Moore, David J. Morgan, Stuart Moss, Syed  
20 Murtuza Baker, Rob Oliver, Grace Padden, Christina Parkinson, Laurence Pearmain, Mike Phuychareon, Ananya Saha,  
21 Barbora Salcman, Nicholas A. Scott, Seema Sharma, Jane Shaw, Joanne Shaw, Elizabeth Shepley, Lara Smith, Simon  
22 Stephan, Ruth Stephens, Gael Tavernier, Rhys Tudge, Louis Wareing, Roanna Warren, Thomas Williams, Lisa Willmore,  
23 Mehwish Younas,

### 24 **Authorship Contributions**

25 K.S., performed the data collection and generated the figures and K.S., L.M., L.R. and J.G. analysed the data.

26 K.S., J.G., T.H., C.S. and S.A. designed the study, interpreted the data and wrote the manuscript.

27 E.M., M.M. and S.K. performed sample collection and biobanking.

28 PD, AS, TF, AH identified the participants and supervised recruitment and designed the clinical follow up.

### 29 **Disclosure of Conflicts of Interest**

30 The authors declare no conflicts of interest

1 **Table 1**

|                                                 | Healthy controls     | All COVID-19 patients    | Mild COVID-19        | Moderate COVID-19       | Severe COVID-19       |
|-------------------------------------------------|----------------------|--------------------------|----------------------|-------------------------|-----------------------|
| <b>n</b>                                        | 20                   | 23                       | 7                    | 9                       | 7                     |
| <b>Age (Years) [N]</b>                          | 67 (53-73.8) [16]    | 58 (51-73)               | 58 (35-73)           | 59 (44.5-74)            | 58 (51-74)            |
| <b>Sex (Male)</b>                               | 7/16 (43.8 %)        | 16 (69.6%)               | 4 (57.1%)            | 7 (77.8%)               | 5 (71.4%)             |
| <b>BMI (kg/m<sup>2</sup>) [N]</b>               | ND                   | 27.8 (24.7-31) [16]      | 27.3 (26.2-31.6) [5] | 28.3 (24.6-31.2) [7]    | 27 (23.1-31.8) [4]    |
| <b>Co-morbidity</b>                             |                      |                          |                      |                         |                       |
| Diabetes                                        | Type 2 1/16 (6.3%)   | Type 2 4/18 (22.2%)      | Type 2 1/6 (16.7%)   | Type 2 1/6 (16.7%)      | Type 2 2/6 (33.3%)    |
| COPD                                            | 0/16 (0%)            | 4/19 (21.1%)             | 2/6 (33.3%)          | 1/7 (14.3%)             | 1/6 (16.7%)           |
| Asthma                                          | 0/16 (0%)            | 1/18 (5.6%)              | 0/6 (0%)             | 0/6 (0%)                | 1/6 (16.7%)           |
| IHD                                             | CAD 1/16 (6.3%)      | Angina 2/18 (11.1%)      | 0/6 (0%)             | Angina 1/6 (16.7%)      | Angina 1/6 (16.7%)    |
| HTN                                             | 4/16 (25%)           | 6/18 (33.3%)             | 1/6 (16.7%)          | 4/6 (66.7%)             | 1/6 (16.7%)           |
| <b>Illness onset to sample (days) [N]</b>       | N/A                  | 8 (4.5-10.8) [20]        | 7 (4-10.3) [6]       | 7 (4-10) [7]            | 9 (7-15)              |
| <b>Presentation</b>                             |                      |                          |                      |                         |                       |
| Respiratory rate (BPM) [N]                      | ND                   | 20 (17.5-23) [21]        | 20 (19-24)           | 18 (17.3-19.8) [8]      | 21 (16.8-22.5) [6]    |
| O <sub>2</sub> Sats (%) [N]                     | ND                   | 96 (91-96.5) [21]        | 96 (94-97)           | 96 (92.3-97.5) [8]      | 90 (86.7-96) [6]      |
| Temperature (°C) [N]                            | ND                   | 37.7 (37.1-38.4) [21]    | 37.4 (36.5-38.1)     | 37.7 (37.1-38.8) [8]    | 37.8 (37.3-38.7) [6]  |
| Systolic blood pressure (mmHg) [N]              | ND                   | 122 (111.5-133.5) [21]   | 122 (117-126)        | 117.5 (103.5-134.3) [8] | 126.5 (112.5-161) [6] |
| Dyspnoea                                        | N/A                  | 13/18 (72.2%)            | 3 (42.9%)            | 4/5 (80%)               | 6/6 (100%)            |
| Fever                                           | N/A                  | 14/18 (77.8%)            | 5 (71.4%)            | 3/5 (60%)               | 6/6 (100%)            |
| Cough                                           | N/A                  | 13/18 (72.2%)            | 4 (57.1%)            | 3/5 (60%)               | 6/6 (100%)            |
| Myalgia                                         | N/A                  | 6/18 (33.3%)             | 3 (42.9%)            | 1/5 (20%)               | 2/6 (33.3%)           |
| Fatigue                                         | N/A                  | 2/16 (12.5%)             | 0/6 (0%)             | 1/4 (25%)               | 1/6 (16.7%)           |
| <b>Chest Radiograph Findings</b>                |                      |                          |                      |                         |                       |
| Bilateral opacification                         | N/A                  | 9/12 (75%)               | 3/5 (60%)            | 3/4 (75%)               | 3/3 (100%)            |
| Unilateral opacification                        | N/A                  | 2/12 (16.7%)             | 1/5 (20%)            | 1/4 (25%)               | 0/3 (0%)              |
| No abnormality                                  | N/A                  | 1/12 (8.3%)              | 1/5 (20%)            | 0/4 (0%)                | 0/3 (0%)              |
| <b>COVID Nasopharyngeal Test (+)</b>            | ND                   | 16 (69.6%)               | 4 (57.1%)            | 7 (77.8%)               | 5 (71.4%)             |
| <b>Thromboprophylaxis</b>                       | Aspirin 4/16 (25%)   | 14/17 (82.4%)            | 5/6 (83.3%)          | 6/6 (100%)              | 3/5 (60%)             |
| <b>Antithrombotic Treatment Dose</b>            | 0/16 (0%)            | 1/10 (10%)               | 1/4 (25%)            | 0/3 (0%)                | 0/3 (0%)              |
| <b>Admission Full Blood Count [N]</b>           |                      |                          |                      |                         |                       |
| WCC (x10 <sup>9</sup> /l, normal 3.5-10)        | 5.5 (4.6-7.8) [16]   | 6.6 (5.4-9.8)            | 4.7 (4.1-6.9)        | 6.6 (6.2-10.4)          | 9.4 (6.6-10.1)        |
| Lymphocytes(x10 <sup>9</sup> /l, normal 0.5-5)  | 1.4 (1.2-2.0) [16]   | 0.9 (0.8-1.3)            | 0.9 (0.78-1.1)       | 1.01 (0.9-1.5)          | 0.8 (0.8-1.1)         |
| Neutrophils(x10 <sup>9</sup> /l, normal 2-7.5)  | 3.2 (2.3-5.1) [16]   | 5.4 (3.7-7.7)            | 3.5 (2.6-5.7)        | 5.1 (4.6-7.6)           | 8.4 (5.4-8.7)         |
| Monocytes(x10 <sup>9</sup> /l, normal 0.2-0.8)  | 0.4 (0.3-0.5) [16]   | 0.38 (0.2-0.5)           | 0.38 (0.2-0.5)       | 0.5 (0.33-0.9)          | 0.3 (0.2-0.3)         |
| Platelets (x10 <sup>9</sup> /l, normal 150-370) | 244.5 (202-294) [16] | 246.5 (190.5-345.8) [20] | 209 (180-263.3) [6]  | 338.5 (207.8-472.3) [8] | 264 (149.8-417) [6]   |
| <b>Acute phase responses (IU/L) [N]</b>         |                      |                          |                      |                         |                       |
| CRP                                             | ND                   | 116 (23-207)             | 54 (16-138)          | 68 (19.5-186)           | 256 (116-335)         |
| ALT                                             | ND                   | 35 (27-58.5) [9]         | 82.5 (82-83) [2]     | 59.5 (12.8-92) [4]      | 82 (57-176) [3]       |
| ALP                                             | ND                   | 82 (52.5-91) [9]         | 36.5 (21-52) [2]     | 33.5 (18.8-34.8) [4]    | 65 (36-181) [3]       |
| Bilirubin                                       | ND                   | 11 (8-15) [9]            | 8 (7-9) [2]          | 15 (6.5-19.8) [4]       | 11 (9-11) [3]         |
| <b>Complications</b>                            |                      |                          |                      |                         |                       |
| PE                                              | N/A                  | 1/12 (8.3%)              | 0/5 (0%)             | 1/4 (25%)               | 0/3 (0%)              |
| AKI                                             | N/A                  | 2/12 (16.7%)             | 0/5 (0%)             | 2/5 (40%)               | 0/2 (0%)              |
| Mortality                                       | N/A                  | 3 (13%)                  | 1 (14.3%)            | 0 (0%)                  | 2 (28.6%)             |
| <b>Clinical D-Dimer (High &gt; 500 ng/ml)</b>   | ND                   | 4/7 (57%)                | 1/1 (100%)           | 3/5 (60%)               | 0/1 (0%)              |
| <b>Plasma Total Protein (mg/ml)</b>             | 34.2 (31.0-39.3)     | 35.1 (29.1-41.1)         | 34.7 (30.8-35.1)     | 36.5 (24.5-42.9)        | 38.7 (24.5-42.6)      |
| <b>Plasma Coagulation Factors</b>               |                      |                          |                      |                         |                       |
| Plasminogen (µg/ml)                             | 78 (23.5-192.4)      | 80.2 (69.2-107.7)        | 80.4 (75.4-92.4)     | 80.2 (67.5-112.5)       | 72.2 (59.4-110.5)     |
| Antithrombin (µg/ml)                            | 92.3 (30.1-237.6)    | 94.8 (69.1-105.6)        | 101.4 (82.6-105.6)   | 90.3 (65.4-98.3)        | 104.3 (73.2-124.9)    |
| Prothrombin (µg/ml)                             | 28.2 (11.0-76.0)     | 36.2 (23.9-41.8)         | 36.2 (23.1-46.3)     | 29.8 (22.8-39.3)        | 39.1 (30.1-54.9)      |
| Factor IX (ng/ml)                               | 802 (701-1054)       | 1071 (811-1360)          | 1002 (425-1118)      | 1335 (1078-2091)        | 945 (658-2102)        |
| <b>Thrombo-inflammatory Markers</b>             |                      |                          |                      |                         |                       |
| IL-12p70 (pg/ml)                                | 1.3 (1.3-1.31)       | 1.3 (1.3-2.19)           | 1.3 (1.3-1.44)       | 1.3 (1.3-15.7)          | 1.69 (1.3-2.77)       |
| P-selectin (ng/ml)                              | 72.5 (55.6-105.7)    | 146.8 (78.2-208.6)       | 166.6 (91.1-237.4)   | 109.5 (40.5-176.1)      | 156.2 (88.4-240.0)    |
| D-Dimer (ng/ml)                                 | 6.5 (2.2-15.7)       | 8.3 (2.8-25.2)           | 1.8 (1.3-10.5)       | 8.9 (3.9-17.4)          | 56.4 (5.8-114.5)      |
| sCD40L (ng/ml)                                  | 1.07 (0.72-1.54)     | 2.24 (0.69-2.71)         | 1.66 (1.28-2.47)     | 2.24 (0.35-3.08)        | 2.41 (0.61-3.46)      |
| PSGL-1 (ng/ml)                                  | 2.24 (1.98-3.12)     | 4.04 (2.70-5.06)         | 4.04 (3.89-5.09)     | 4.1 (2.29-5.29)         | 3.07 (1.18-5.06)      |

**Table 1. Clinical characteristics.** Data are median (IQR). n (%) or n/N (%), where N is the total number with available data. Numbers in red are the lower detection limit of the assay. ND, not determined in healthy controls. N/A, not applicable to healthy controls.

2  
3  
4

1 **Figures**  
 2 **Figure 1**

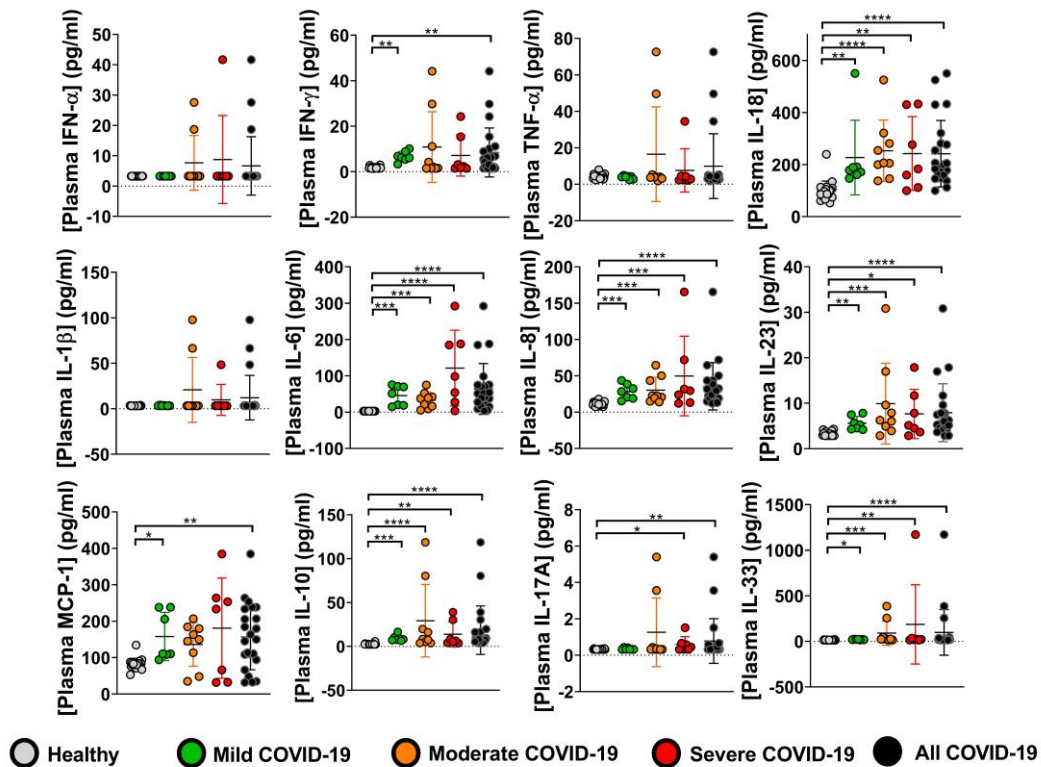

5  
6

7 **Figure 1. Peripheral inflammatory markers are elevated in plasma from COVID-19 patients.** The plasma  
 8 concentrations of soluble cytokines were determined by LEGENDplex™ assay (human inflammation 13-plex panel) as  
 9 per manufacturer’s protocol. Each data point represents the mean of duplicate concentration values determined  
 10 from PE fluorescence intensity. Results are presented as mean ± S.D. for both healthy control (n=20) and COVID-19  
 11 patient plasma (n=23). Comparison of the COVID-19 population and healthy controls was performed using a Mann-  
 12 Whitney test. Comparison of COVID-19 sub-groups with healthy controls was performed using a Kruskal-Wallis test  
 13 with Dunn’s correction for multiple comparisons (\*<0.05, \*\*p<0.01, \*\*\*p<0.001 and \*\*\*\*p<0.0001).

14  
15  
16  
17  
18  
19  
20  
21  
22

1 **Figure 2**

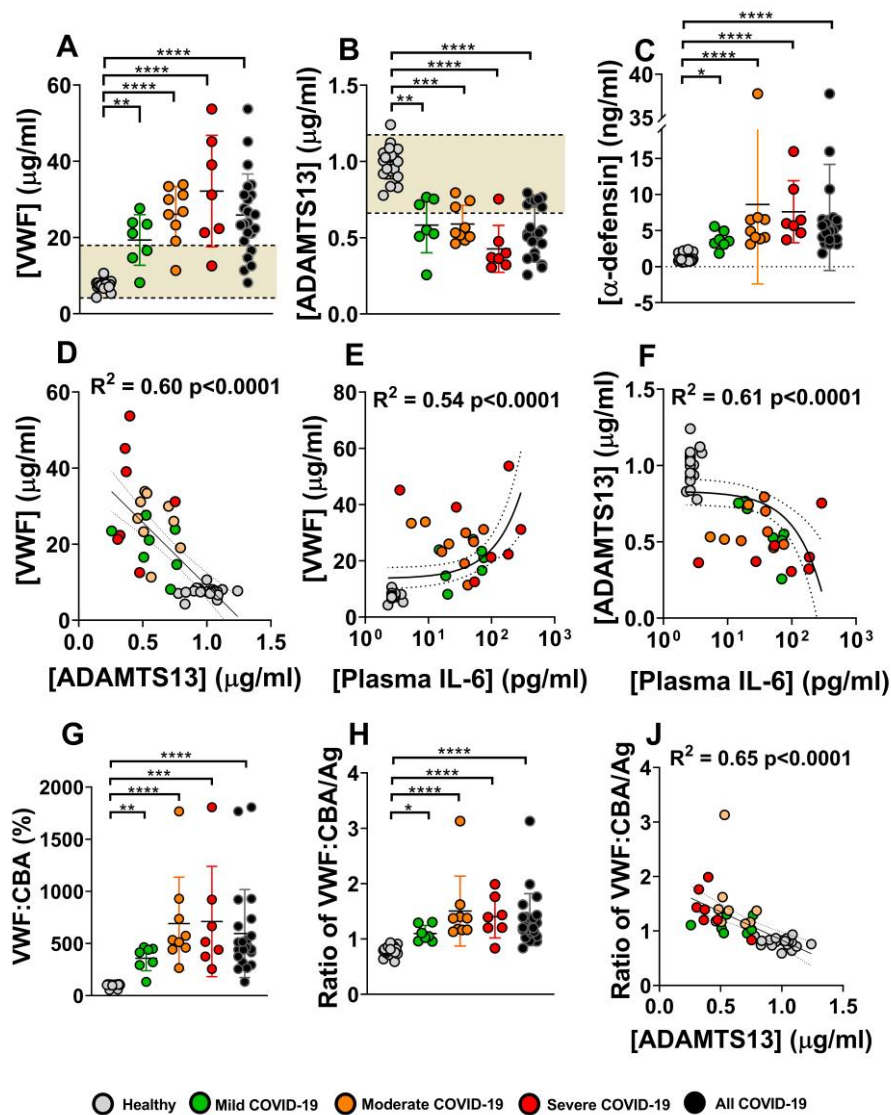

2

3

4 **Figure 2. Plasma from COVID-19 patients reveals an IL-6 driven imbalance in the VWF/ADAMTS13 axis, even in**  
 5 **patients with mild disease.** The plasma concentrations of VWF (A) and ADAMTS13 (B) were determined by in-house  
 6 ELISA. The plasma concentrations of  $\alpha$ -defensins were determined using a commercial ELISA kit (C). Each data point  
 7 represents the mean of duplicate concentration values determined for each sample. Results are presented as mean  
 8  $\pm$  S.D. for both healthy control (n=20) and COVID-19 patient plasma (n=23). Linear regression (solid line) with 95%  
 9 confidence intervals (dotted lines) are included to show the relationship between VWF and ADAMTS13 (D) and  
 10 between plasma IL-6 and VWF (E) or ADAMTS13 (F). In each case Spearman's rank coefficient correlation tests were  
 11 performed to determine  $R^2$  values. The effect of VWF/ADAMTS13 imbalance on the prevalence of high molecular  
 12 weight (HMW) VWF multimers in plasma was determined by collagen binding assay. The amount of HMW VWF  
 13 (relative to that in the healthy control group) (G) was normalised by total VWF antigen to give the ratio of CBA/Ag  
 14 (H). Linear regression and Spearman's correlation were performed to show the relationship between HMW VWF and  
 15 ADAMTS13 (J). Areas shaded in yellow represent the literature values of the normal range. Comparison of the  
 16 COVID-19 population and healthy controls was performed using a Mann-Whitney test. Comparison of COVID-19 sub-  
 17 groups with healthy controls was performed with a Kruskal-Wallis test with Dunn's correction for multiple  
 18 comparisons (\* $<0.05$ , \*\* $p<0.01$  and \*\*\*\* $p<0.0001$ ).

19

1 **Figure 3**

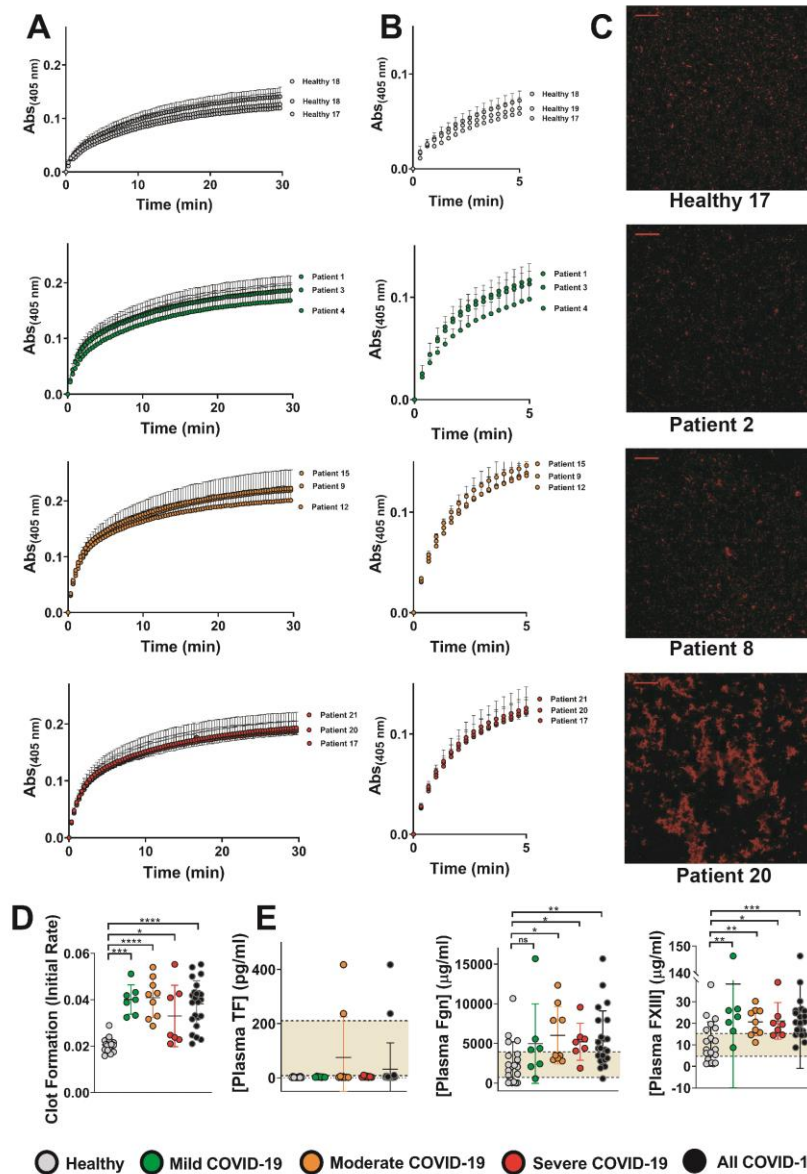

2

3 **Figure 3. Thrombin-induced fibrin formation occurs at a faster rate in plasma from COVID-19 patients indicating a**  
 4 **denser fibrin network. (A)**, Turbidity assays were performed using plasma from healthy controls (n=20) and COVID-  
 5 19 patient plasma (n=23). The absorbance measurements from 4 independent experiments (mean  $\pm$  S.D.) are shown  
 6 for 3 samples from each sub group (healthy, mild, moderate and severe COVID-19). **(B)**, the mean absorbance values  
 7 for each sample over the first 3 minutes (9 measurements) were fitted to a linear regression model to determine the  
 8 initial rate of change of fibrin formation (slope). **(C)**, the structure of the fibrin network, formed in the presence of  
 9 AlexaFluor594 labelled fibrinogen (red), was visualised by confocal microscopy. Shown are example images from one  
 10 sample in each subgroup. Scale bars represent 200  $\mu$ m. Further imaging of a selection of samples from each group  
 11 was also performed and can be found in **Supplementary Figure 2**. **(D)**, the initial rate values for fibrin formation in  
 12 each sample were determined from 4 independent experiments and are presented as mean  $\pm$  S.D. **(E)**, Plasma  
 13 concentrations of tissue factor (TF), fibrinogen (Fgn) and Factor XIII (FXIII) were determined by LEGENDplex™ assay  
 14 (human fibrinolysis 5-plex and human thrombosis custom 7-plex panels) as per manufacturer's protocol. Each data  
 15 point represents the mean of duplicate concentration values determined from fluorescence intensity and results are  
 16 presented as mean  $\pm$  S.D. Areas shaded in yellow represent the manufacturer's normal range values (755-1698  
 17  $\mu$ g/ml, 6.7-15.3  $\mu$ g/ml and 5.9-200.9 pg/ml for Fgn, FXIII and TF respectively). Comparison of the COVID-19  
 18 population and healthy controls was performed using a Mann-Whitney test. Comparisons of COVID-19 sub-groups  
 19 with healthy controls were performed with a Kruskal-Wallis test with Dunn's correction for multiple comparisons  
 20 (\*<0.05, \*\*p<0.01, \*\*\*p<0.001 and \*\*\*\*p<0.0001).

Figure 4

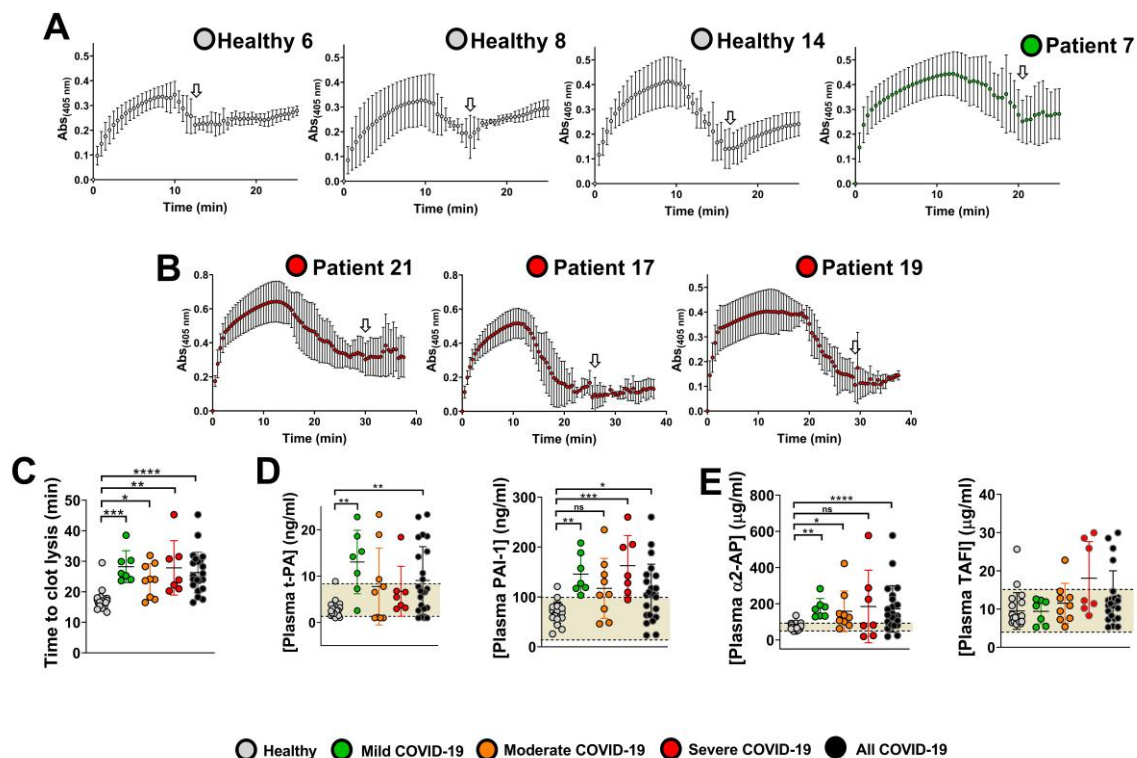

**Figure 4. Fibrin formed in plasma from COVID-19 patients is more resistant to t-PA/plasmin-mediated fibrinolysis.**

Turbidity assays, in which fibrin formation is initiated by the addition of thrombin in the presence of t-PA, were performed using healthy control (n=20) and COVID-19 patient plasma (n=23). Shown are example traces from 3 healthy controls and a mild COVID-19 patient (A) and 3 severe COVID-19 patients (B). For each, absorbance measurements are mean  $\pm$  S.D. from 4 independent experiments. From each trace the mean time to clot lysis was manually determined (white arrows) and are presented for each sample as mean  $\pm$  S.D. from the 4 replicates (C). The plasma concentration of t-PA (D) was determined by LEGENDplex™ assay (human thrombosis custom 7-plex panel) and the concentrations of PAI-1 (D), α<sub>2</sub>-antiplasmin and TAFI (E) were determined by ELISA, as per manufacturer's protocol. Each data point represents the mean of duplicate concentration values determined from PE fluorescence intensity or absorbance measurements, for LEGENDplex and ELISA respectively, and results are presented as mean  $\pm$  S.D. Areas shaded in yellow represent the manufacturer's normal range values (1.6-8.4 ng/ml for t-PA) or literature normal ranges (20-100 ng/ml, 50.4-85.4 μg/ml and 4-15 μg/ml for PAI-1, α<sub>2</sub>-antiplasmin and TAFI respectively). Comparison of the COVID-19 population and healthy controls was performed using a Mann-Whitney test. Comparisons of COVID-19 sub-groups with healthy controls were performed with a Kruskal-Wallis test with Dunn's correction for multiple comparisons (\* $p$ <0.05, \*\* $p$ <0.01, \*\*\* $p$ <0.001 and \*\*\*\* $p$ <0.0001).

1 **Figure 5**

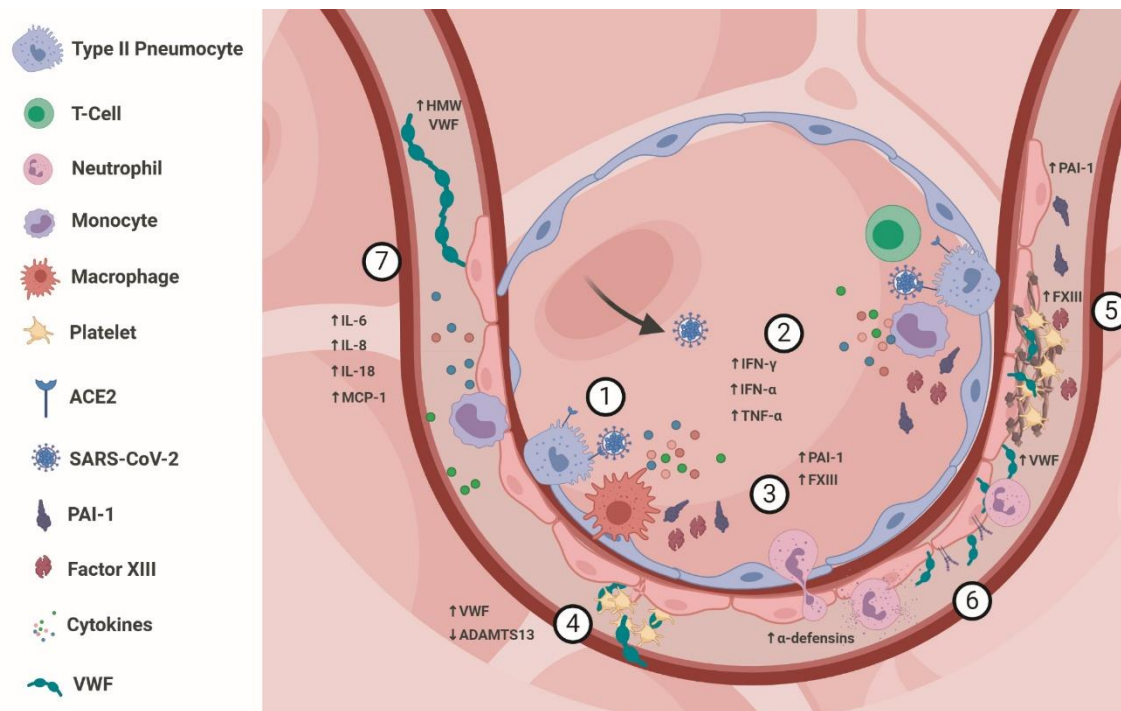

2  
3

4 **Figure 5. Proposed thromboinflammatory mechanisms underlying COVID-19 coagulopathy. (1),** SARS-CoV-2 infects  
5 Type II pneumocytes of the lung epithelium through binding to its ‘receptor’ angiotensin-converting enzyme (ACE)-2.  
6 **(2),** infection elicits a type-1 interferon response (IFN- $\alpha$ ) triggering the release of type-2 interferons (IFN- $\gamma$ ) and pro-  
7 inflammatory cytokines, including tumor necrosis factor (TNF)- $\alpha$ , from the epithelial cells and tissue resident  
8 leukocytes. **(3),** resident macrophages, monocyte-derived macrophages and infiltrating monocytes express  
9 coagulation factor XIII (FXIII) and plasmin activator inhibitor (PAI)-1. **(4),** endothelial activation induces Weibel-Palade  
10 body exocytosis and the release of von Willebrand factor (VWF). Concurrent depletion of ADAMTS13 results in the  
11 formation of ultra large (UL)-VWF multimers with high platelet reactivity and the formation of platelet aggregates.  
12 **(5),** the activated endothelium further contributes to increased plasma PAI-1 and recruited platelets release FXIII.  
13 Together, these changes drive the formation of fibrinolytic resistant fibrin deposits. **(6)** up-regulation of cell adhesion  
14 molecules on the endothelium facilitates the further recruitment of leukocytes and propagation of the inflammatory  
15 response. The release of  $\alpha$ -defensins from infiltrating neutrophils causes further endothelial activation and  
16 VWF/ADAMTS13 imbalance. **(7),** together these immune and inflammatory responses result in a systemic pro-  
17 inflammatory state, through increased levels cytokines (interleukin (IL)-6, IL-8, IL-18 and monocyte chemoattractant  
18 protein (MCP)-1) and a systemic pro-coagulant state through increased circulating UL-VWF, FXIII, PAI-1 and  $\alpha$ -  
19 defensins.

20  
21



1 **Supplementary Material**

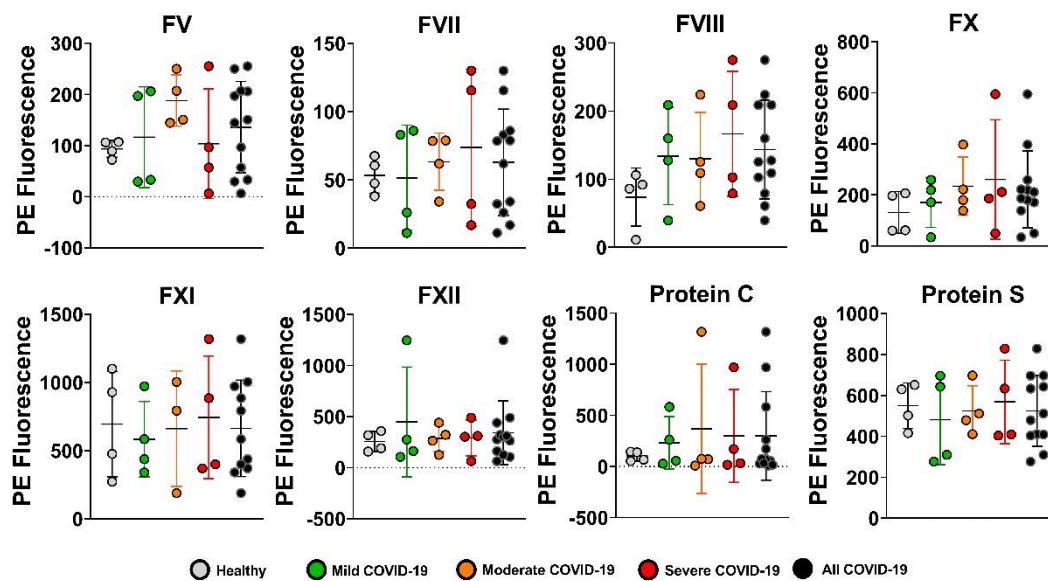

2

3

4

5

**Figure S1. The concentrations of many plasma coagulation factors are not significantly altered in COVID-19 patients.** The plasma concentrations of coagulation factors were determined by ProcartaPlex™ assay (coagulation panels 1-3) as per manufacturer's protocol. Each data point represents the mean of duplicate PE fluorescence measurements. Results are presented as mean  $\pm$  S.D. for both healthy control (n=4) and COVID-19 patient plasma (n=11-12). In the moderate group a sampling error reduced the number of FXI readings to n=3. Comparison of the COVID-19 population and healthy controls was performed using a Mann-Whitney test and showed no significant difference.

12

13

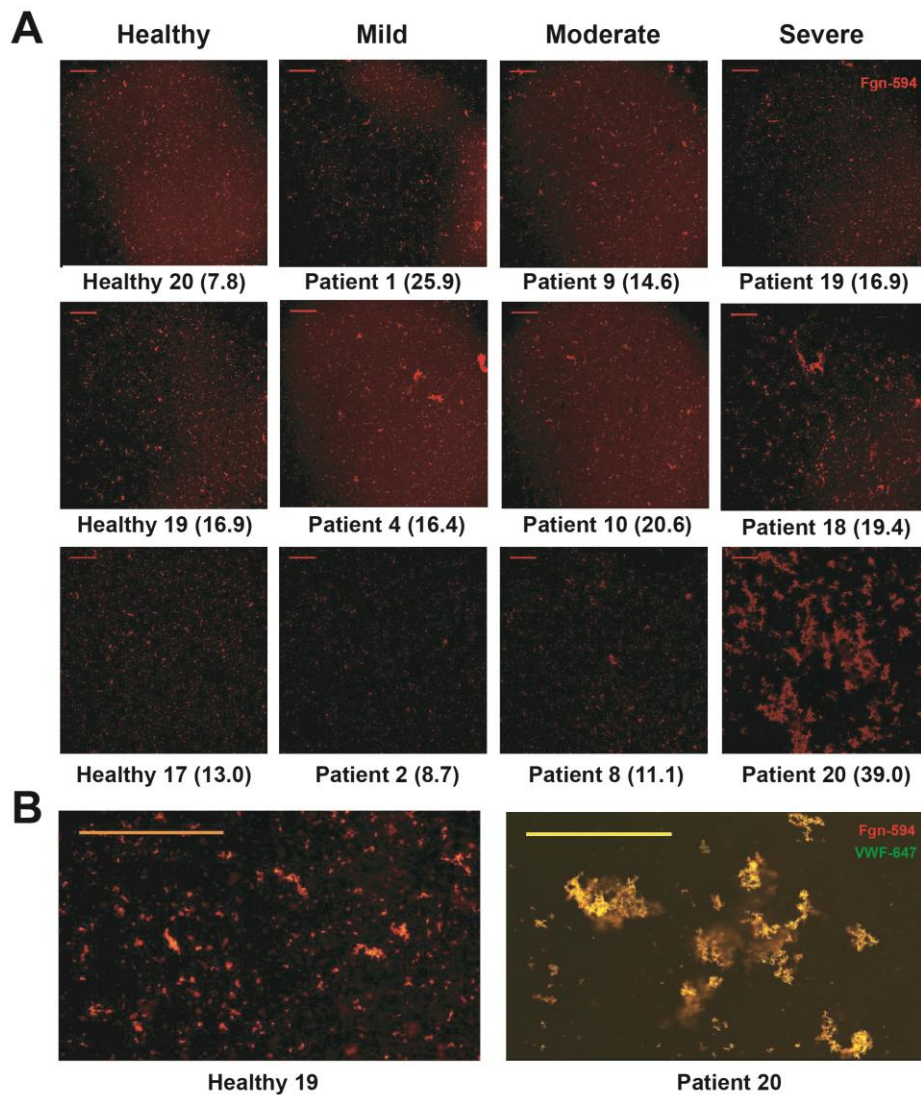

**Figure S2. The microscopic structure of fibrin in *in vitro* 'clots'.** **A**, fibrin clots, formed in plasma from 3 healthy controls and 3 patients from each COVID-19 sub-group, were imaged by confocal microscopy. Selection of samples from COVID-19 groups was based on FXIII concentrations (numbers in brackets) which were either within, or above, the normal range of 6.7-15.3  $\mu\text{g}/\text{ml}$ . **B**, example images at higher magnification showing co-localisation (yellow) of fibrin clusters and VWF staining. Scale bars represent 200  $\mu\text{m}$ .

1  
2  
3  
4  
5  
6  
7  
8  
9  
10  
11  
12  
13  
14  
15  
16  
17

1

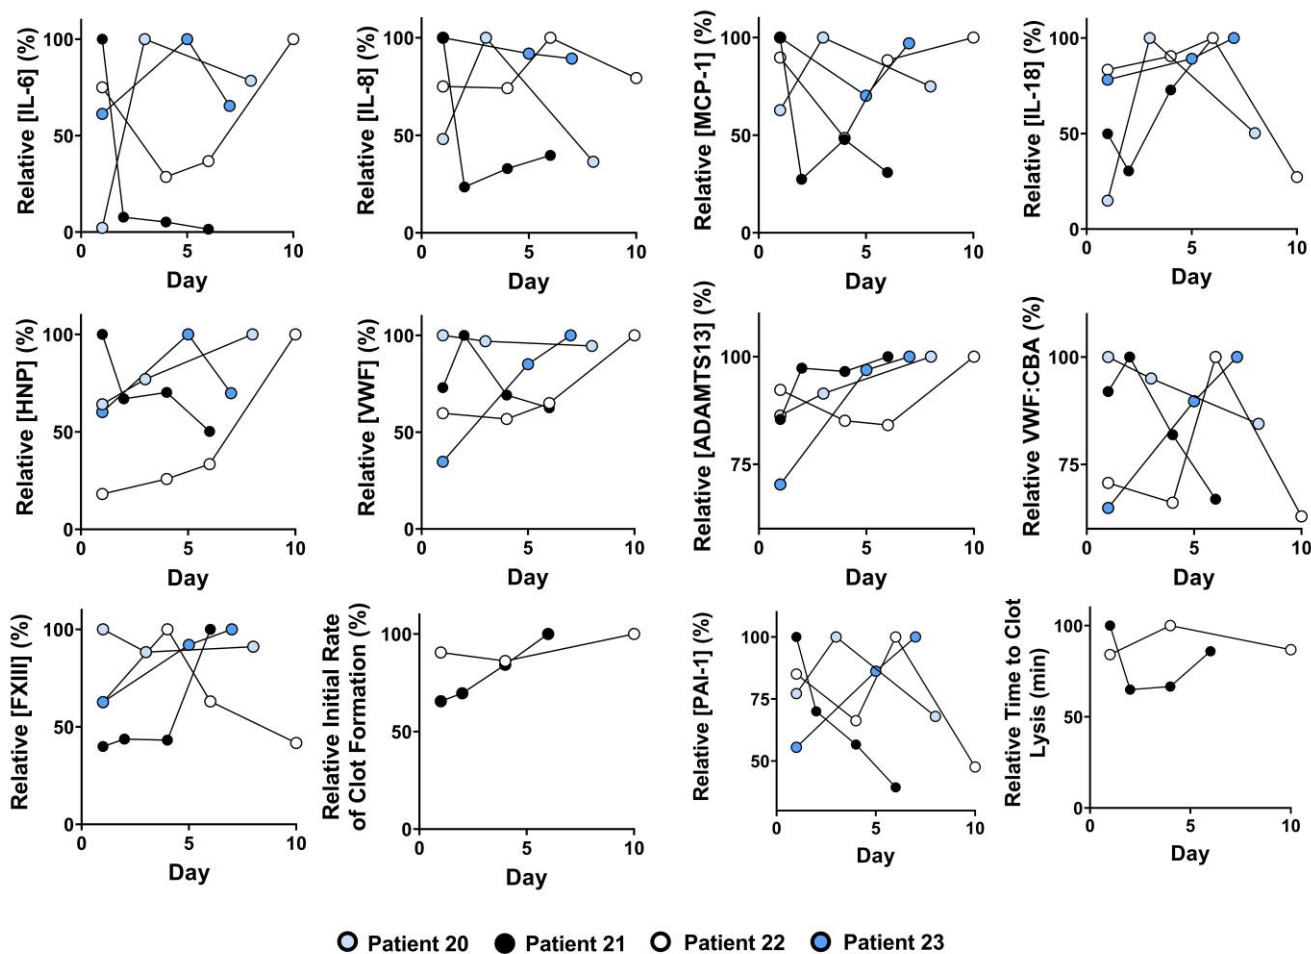

2

3

4 **Figure S3. Longitudinal analysis of thromboinflammatory parameters in severe COVID-19 patients.** Plasma at each  
 5 time point was immediately banked upon collection and all samples were analysed at the same time and alongside  
 6 all other healthy and patient samples. The x-axis refers to the number of days elapsed since ICU admission. Data for  
 7 each individual parameter has been normalised for each sample relative to the maximal response observed in that  
 8 patient series. Due to the low volume of plasma available for some time points in patients 20 and 23, fibrin  
 9 formation and fibrinolysis assays were not performed.

10

11

12

13

14

15

16

17

18

19

## References

1. Tang N, Li D, Wang X and Sun Z. Abnormal coagulation parameters are associated with poor prognosis in patients with novel coronavirus pneumonia. *J Thromb Haemost.* 2020;18:844-847.
2. Panigada M, Bottino N, Tagliabue P, Grasselli G, Novembrino C, Chantarangkul V, Pesenti A, Peyvandi F and Tripodi A. Hypercoagulability of COVID-19 patients in Intensive Care Unit. A Report of Thromboelastography Findings and other Parameters of Hemostasis. *J Thromb Haemost.* 2020.
3. Klok FA, Kruip M, van der Meer NJM, Arbous MS, Gommers D, Kant KM, Kaptein FHJ, van Paassen J, Stals MAM, Huisman MV and Endeman H. Incidence of thrombotic complications in critically ill ICU patients with COVID-19. *Thromb Res.* 2020.
4. Cui S, Chen S, Li X, Liu S and Wang F. Prevalence of venous thromboembolism in patients with severe novel coronavirus pneumonia. *J Thromb Haemost.* 2020.
5. Llitjos JF, Leclerc M, Chochois C, Monsallier JM, Ramakers M, Auvray M and Merouani K. High incidence of venous thromboembolic events in anticoagulated severe COVID-19 patients. *J Thromb Haemost.* 2020.
6. Lodigiani C, Iapichino G, Carenzo L, Cecconi M, Ferrazzi P, Sebastian T, Kucher N, Studt JD, Sacco C, Alexia B, Sandri MT, Barco S and Humanitas C-TF. Venous and arterial thromboembolic complications in COVID-19 patients admitted to an academic hospital in Milan, Italy. *Thromb Res.* 2020;191:9-14.
7. Bellosta R, Luzzani L, Natalini G, Pegorer MA, Attisani L, Cossu LG, Ferrandina C, Fossati A, Conti E, Bush RL and Piffaretti G. Acute limb ischemia in patients with COVID-19 pneumonia. *J Vasc Surg.* 2020.
8. Marone EM and Rinaldi LF. Upsurge of deep venous thrombosis in patients affected by COVID-19: Preliminary data and possible explanations. *J Vasc Surg Venous Lymphat Disord.* 2020;8:694-695.
9. Beyroui R, Adams ME, Benjamin L, Cohen H, Farmer SF, Goh YY, Humphries F, Jäger HR, Losseff NA, Perry RJ, Shah S, Simister RJ, Turner D, Chandratheva A and Werring DJ. Characteristics of ischaemic stroke associated with COVID-19. *Journal of Neurology, Neurosurgery & Psychiatry.* 2020;jnnp-2020-323586.
10. Avula A, Nalleballe K, Narula N, Sapozhnikov S, Dandu V, Toom S, Glaser A and Elsayegh D. COVID-19 presenting as stroke. *Brain Behav Immun.* 2020;87:115-119.
11. Yaghi S, Ishida K, Torres J, Mac Grory B, Raz E, Humbert K, Henninger N, Trivedi T, Lillemoe K, Alam S, Sanger M, Kim S, Scher E, Dehkharghani S, Wachs M, Tanweer O, Volpicelli F, Bosworth B, Lord A and Frontera J. SARS2-CoV-2 and Stroke in a New York Healthcare System. *Stroke.* 2020:STROKEAHA120030335.
12. Oxley TJ, Mocco J, Majidi S, Kellner CP, Shoirah H, Singh IP, De Leacy RA, Shigematsu T, Ladner TR, Yaeger KA, Skliut M, Weinberger J, Dangayach NS, Bederson JB, Tuhim S and Fifi JT. Large-Vessel Stroke as a Presenting Feature of Covid-19 in the Young. *N Engl J Med.* 2020.
13. South K, McCulloch L, McColl BW, Elkind M, Allan SM and Smith C. EXPRESS: Preceding Infection and Risk of Stroke: An Old Concept Revived by the COVID-19 Pandemic. *Int J Stroke.* 2020:1747493020943815.
14. Manne BK, Denorme F, Middleton EA, Portier I, Rowley JW, Stubben CJ, Petrey AC, Tolley ND, Guo L, Cody MJ, Weyrich AS, Yost CC, Rondina MT and Campbell RA. Platelet Gene Expression and Function in COVID-19 Patients. *Blood.* 2020.
15. Middleton EA, He XY, Denorme F, Campbell RA, Ng D, Salvatore SP, Mostyka M, Baxter-Stoltzfus A, Borczuk AC, Loda M, Cody MJ, Manne BK, Portier I, Harris E, Petrey AC, Beswick EJ, Caulin AF, Iovino A, Abegglen LM, Weyrich AS, Rondina MT, Egeblad M, Schiffman JD and Yost CC. Neutrophil Extracellular Traps (NETs) Contribute to Immunothrombosis in COVID-19 Acute Respiratory Distress Syndrome. *Blood.* 2020.
16. Goshua G, Pine AB, Meizlish ML, Chang CH, Zhang H, Bahel P, Baluha A, Bar N, Bona RD, Burns AJ, Dela Cruz CS, Dumont A, Halene S, Hwa J, Koff J, Menninger H, Neparidze N, Price C, Siner JM, Tormey C, Rinder HM, Chun HJ and Lee AI. Endotheliopathy in COVID-19-associated coagulopathy: evidence from a single-centre, cross-sectional study. *Lancet Haematol.* 2020.
17. Escher R, Breakey N and Lammler B. ADAMTS13 activity, von Willebrand factor, factor VIII and D-dimers in COVID-19 inpatients. *Thromb Res.* 2020;192:174-175.
18. Helms J, Tacquard C, Severac F, Leonard-Lorant I, Ohana M, Delabranche X, Merdji H, Clere-Jehl R, Schenck M, Fagot Gandet F, Fafi-Kremer S, Castelain V, Schneider F, Grunebaum L, Angles-Cano E, Sattler L, Mertes PM, Meziani F and Group CT. High risk of thrombosis in patients with severe SARS-CoV-2 infection: a multicenter prospective cohort study. *Intensive Care Med.* 2020;46:1089-1098.
19. Medcalf RL, Keragala CB and Myles PS. Fibrinolysis and COVID-19: a plasmin paradox. *J Thromb Haemost.* 2020.
20. Hethershaw EL, Cilia La Corte AL, Duval C, Ali M, Grant PJ, Ariens RA and Philippou H. The effect of blood coagulation factor XIII on fibrin clot structure and fibrinolysis. *J Thromb Haemost.* 2014;12:197-205.

- 1 21. Fraser SR, Booth NA and Mutch NJ. The antifibrinolytic function of factor XIII is exclusively expressed through  
2 alpha(2)-antiplasmin cross-linking. *Blood*. 2011;117:6371-4.
- 3 22. Andersson HM, Siegerink B, Luken BM, Crawley JT, Algra A, Lane DA and Rosendaal FR. High VWF, low  
4 ADAMTS13, and oral contraceptives increase the risk of ischemic stroke and myocardial infarction in young women.  
5 *Blood*. 2012;119:1555-60.
- 6 23. Newnham M, South K, Bleda M, Auger WR, Barbera JA, Bogaard H, Bunclark K, Cannon JE, Delcroix M,  
7 Hadinnapola C, Howard LS, Jenkins D, Mayer E, Ng C, Rhodes CJ, Sreaton N, Sheares K, Simpson MA, Southwood M,  
8 Su L, Taboada D, Traylor M, Trembath RC, Villar SS, Wilkins MR, Wharton J, Graf S, Pepke-Zaba J, Laffan M, Lane DA,  
9 Morrell NW and Toshner M. The ADAMTS13-VWF axis is dysregulated in chronic thromboembolic pulmonary  
10 hypertension. *Eur Respir J*. 2019;53.
- 11 24. Levy JH and Goodnough LT. How I use fibrinogen replacement therapy in acquired bleeding. *Blood*.  
12 2015;125:1387-1393.
- 13 25. Morange PE, Alessi MC, Verdier M, Casanova D, Magalon G and Juhan-Vague I. PAI-1 produced ex vivo by  
14 human adipose tissue is relevant to PAI-1 blood level. *Arterioscler Thromb Vasc Biol*. 1999;19:1361-5.
- 15 26. Mosnier LO, von dem Borne PA, Meijers JC and Bouma BN. Plasma TAFI levels influence the clot lysis time in  
16 healthy individuals in the presence of an intact intrinsic pathway of coagulation. *Thromb Haemost*. 1998;80:829-35.
- 17 27. Mann ER, Menon M, Knight SB, Konkell JE, Jagger C, Shaw TN, Krishnan S, Rattray M, Ustianowski A, Bakerly  
18 ND, Dark P, Lord G, Simpson A, Felton T, Ho L-P, Feldmann M, Grainger J and Hussell T. Longitudinal immune  
19 profiling reveals distinct features of COVID-19 pathogenesis. *medRxiv*. 2020:2020.06.13.20127605.
- 20 28. Wilson JG, Simpson LJ, Ferreira A-M, Rustagi A, Roque J, Asuni A, Ranganath T, Grant PM, Subramanian A,  
21 Rosenberg-Hasson Y, Maecker HT, Holmes SP, Levitt JE, Blish CA and Rogers AJ. Cytokine profile in plasma of severe  
22 COVID-19 does not differ from ARDS and sepsis. *medRxiv*. 2020:2020.05.15.20103549.
- 23 29. Carsana L, Sonzogni A, Nasr A, Rossi RS, Pellegrinelli A, Zerbi P, Rech R, Colombo R, Antinori S, Corbellino M,  
24 Galli M, Catena E, Tosoni A, Gianatti A and Nebuloni M. Pulmonary post-mortem findings in a series of COVID-19  
25 cases from northern Italy: a two-centre descriptive study. *Lancet Infect Dis*. 2020.
- 26 30. Fox SE, Akmatbekov A, Harbert JL, Li G, Brown JQ and Vander Heide RS. Pulmonary and Cardiac Pathology in  
27 Covid-19: The First Autopsy Series from New Orleans. *medRxiv*. 2020:2020.04.06.20050575.
- 28 31. Rapkiewicz AV, Mai X, Carsons SE, Pittaluga S, Kleiner DE, Berger JS, Thomas S, Adler NM, Charytan DM,  
29 Gasmi B, Hochman JS and Reynolds HR. Megakaryocytes and platelet-fibrin thrombi characterize multi-organ  
30 thrombosis at autopsy in COVID-19: A case series. *EClinicalMedicine*.
- 31 32. Bernardo A, Ball C, Nolasco L, Moake JF and Dong JF. Effects of inflammatory cytokines on the release and  
32 cleavage of the endothelial cell-derived ultralarge von Willebrand factor multimers under flow. *Blood*. 2004;104:100-  
33 6.
- 34 33. Cao WJ, Niiya M, Zheng XW, Shang DZ and Zheng XL. Inflammatory cytokines inhibit ADAMTS13 synthesis in  
35 hepatic stellate cells and endothelial cells. *J Thromb Haemost*. 2008;6:1233-5.
- 36 34. Pillai VG, Bao J, Zander CB, McDaniel JK, Chetty PS, Seeholzer SH, Bdeir K, Cines DB and Zheng XL. Human  
37 neutrophil peptides inhibit cleavage of von Willebrand factor by ADAMTS13: a potential link of inflammation to TTP.  
38 *Blood*. 2016;128:110-9.
- 39 35. Nicolai L, Leunig A, Brambs S, Kaiser R, Weinberger T, Weigand M, Muenchhoff M, Hellmuth JC, Ledderose S,  
40 Schulz H, Scherer C, Rudelius M, Zoller M, Höchter D, Keppler O, Teupser D, Zwißler B, Bergwelt-Baildon M, Kääh S,  
41 Massberg S, Pekayvaz K and Stark K. Immunothrombotic Dysregulation in COVID-19 Pneumonia is Associated with  
42 Respiratory Failure and Coagulopathy. *Circulation*. 0.
- 43 36. Hottz ED, Azevedo-Quintanilha IG, Palhinha L, Teixeira L, Barreto EA, Pao CRR, Righy C, Franco S, Souza TML,  
44 Kurtz P, Bozza FA and Bozza PT. Platelet activation and platelet-monocyte aggregates formation trigger tissue factor  
45 expression in severe COVID-19 patients. *Blood*. 2020.
- 46 37. Bomhof G, Mutsaers P, Leebeek FWG, Te Boekhorst PAW, Hofland J, Croles FN and Jansen AJG. COVID-19-  
47 associated immune thrombocytopenia. *Br J Haematol*. 2020;190:e61-e64.
- 48 38. Nougier C, Benoit R, Simon M, Desmurs-Clavel H, Marcotte G, Argaud L, David JS, Bonnet A, Negrier C and  
49 Dargaud Y. Hypofibrinolytic state and high thrombin generation may play a major role in sars-cov2 associated  
50 thrombosis. *J Thromb Haemost*. 2020.
- 51 39. Bi X, Su Z, Yan H, Du J, Wang J, Chen L, Peng M, Chen S, Shen B and Li J. Prediction of severe illness due to  
52 COVID-19 based on an analysis of initial Fibrinogen to Albumin Ratio and Platelet count. *Platelets*. 2020;31:674-679.
- 53 40. Miszta A, Pelkmans L, Lindhout T, Krishnamoorthy G, de Groot PG, Hemker CH, Heemskerk JW, Kelchtermans  
54 H and de Laat B. Thrombin-dependent Incorporation of von Willebrand Factor into a Fibrin Network. *J Biol Chem*.  
55 2014;289:35979-86.

- 1 41. Valladolid C, Martinez-Vargas M, Sekhar N, Lam F, Brown C, Palzkill T, Tischer A, Auton M, Vijayan KV,  
2 Rumbaut RE, Nguyen TC and Cruz MA. Modulating the rate of fibrin formation and clot structure attenuates  
3 microvascular thrombosis in systemic inflammation. *Blood Adv.* 2020;4:1340-1349.
- 4 42. Kurniawan NA, Grimbergen J, Koopman J and Koenderink GH. Factor XIII stiffens fibrin clots by causing fiber  
5 compaction. *J Thromb Haemost.* 2014;12:1687-96.
- 6 43. Hada M, Kaminski M, Bockenstedt P and McDonagh J. Covalent crosslinking of von Willebrand factor to  
7 fibrin. *Blood.* 1986;68:95-101.
- 8 44. Somodi S, Seres I, Lorincz H, Harangi M, Fulop P and Paragh G. Plasminogen Activator Inhibitor-1 Level  
9 Correlates with Lipoprotein Subfractions in Obese Nondiabetic Subjects. *Int J Endocrinol.* 2018;2018:9596054.
- 10 45. Schmitz T, Bauml CA and Imhof D. Inhibitors of blood coagulation factor XIIIa. *Anal Biochem.* 2020:113708.
- 11 46. Denorme F, Langhauser F, Desender L, Vandenbulcke A, Rottensteiner H, Plaimauer B, Francois O, Andersson  
12 T, Deckmyn H, Scheiflinger F, Kleinschnitz C, Vanhoorelbeke K and De Meyer SF. ADAMTS13-mediated thrombolysis  
13 of t-PA-resistant occlusions in ischemic stroke in mice. *Blood.* 2016;127:2337-45.
- 14 47. South K, Denorme F, Salles C, II, De Meyer SF and Lane DA. Enhanced activity of an ADAMTS-13 variant  
15 (R568K/F592Y/R660K/Y661F/Y665F) against platelet agglutination in vitro and in a murine model of acute ischemic  
16 stroke. *J Thromb Haemost.* 2018;16:2289-2299.
- 17 48. Singh S, Houg A and Reed GL. Releasing the Brakes on the Fibrinolytic System in Pulmonary Emboli: Unique  
18 Effects of Plasminogen Activation and alpha2-Antiplasmin Inactivation. *Circulation.* 2017;135:1011-1020.

19
